# Supplementary material for: REALITIES AND VIRTUALITIES: THE NETWORKING OF VIEWERS, INFORMATION AND SPACES
Source: MDPI journal article supplement (doi:10.3390/jcm10143056), 2005-01-01
Supplement: s1 [file s1]

# Pre-hospital pain management in children with injuries: A retrospective cohort study.

Ada Holak, Michał Czapla and Marzena Zielińska

## Supplementary

Table S1. A comparative analysis of the treatment of the same types of injuries, by age category

|                                                                       |                         | Age category |    |          |    |                        |    |                     |    |             |    | p-value* |
|-----------------------------------------------------------------------|-------------------------|--------------|----|----------|----|------------------------|----|---------------------|----|-------------|----|----------|
|                                                                       |                         | Infants      |    | Toddlers |    | Preschool-age children |    | School-age children |    | Adolescents |    |          |
|                                                                       |                         | n            | %  | n        | %  | n                      | %  | n                   | %  | n           | %  |          |
| Sex                                                                   | Males                   | 49           | 53 | 165      | 61 | 187                    | 67 | 525                 | 67 | 627         | 61 | p<0,014  |
|                                                                       | Females                 | 43           | 47 | 107      | 39 | 91                     | 33 | 261                 | 33 | 395         | 39 |          |
| Injury                                                                | Low-energy              | 37           | 40 | 144      | 53 | 181                    | 65 | 560                 | 71 | 684         | 67 | p<0.001  |
|                                                                       | High-energy             | 51           | 55 | 72       | 26 | 83                     | 30 | 221                 | 28 | 330         | 32 |          |
|                                                                       | Burn-related            | 4            | 4  | 57       | 21 | 14                     | 5  | 6                   | 1  | 8           | 1  |          |
| Accident site                                                         | home                    | 67           | 73 | 218      | 80 | 144                    | 52 | 213                 | 27 | 196         | 19 | p<0.001  |
|                                                                       | school                  | 6            | 7  | 14       | 5  | 44                     | 16 | 293                 | 37 | 342         | 33 |          |
|                                                                       | street and road traffic | 12           | 13 | 17       | 6  | 37                     | 13 | 126                 | 16 | 218         | 21 |          |
|                                                                       | agriculture             | 1            | 1  | -        | -  | -                      | -  | 3                   | 0  | 3           | 0  |          |
|                                                                       | public place            | 6            | 7  | 24       | 9  | 53                     | 19 | 148                 | 19 | 261         | 26 |          |
|                                                                       | work                    | -            | -  | -        | -  | -                      | -  | -                   | -  | 2           | 0  |          |
| *χ <sup>2</sup> test, n—number of patients; %—percentage of patients; |                         |              |    |          |    |                        |    |                     |    |             |    |          |

Table S2. An analysis of the frequency of immobilisation and/or cooling by age group.

|         |     | Age category |    |          |    |                        |    |                     |    |             |     | p-value* |
|---------|-----|--------------|----|----------|----|------------------------|----|---------------------|----|-------------|-----|----------|
|         |     | Infants      |    | Toddlers |    | Preschool-age children |    | School-age children |    | Adolescents |     |          |
|         |     | n            | %  | n        | %  | n                      | %  | n                   | %  | n           | %   |          |
| Cooling | No  | 88           | 96 | 239      | 88 | 263                    | 95 | 780                 | 99 | 1,020       | 100 | p<0.001  |
|         | Yes | 4            | 4  | 34       | 12 | 15                     | 5  | 7                   | 1  | 2           | 0   |          |

|                       |     |    |    |     |    |     |    |     |    |     |    |                   |
|-----------------------|-----|----|----|-----|----|-----|----|-----|----|-----|----|-------------------|
| <b>Immobilisation</b> | No  | 89 | 97 | 256 | 94 | 240 | 86 | 601 | 76 | 728 | 71 | <b>p&lt;0.001</b> |
|                       | Yes | 3  | 3  | 17  | 6  | 38  | 14 | 186 | 24 | 294 | 29 |                   |

\* $\chi^2$  test; n—number of patients; %—percentage of patients;

**Table S3.** An analysis of frequency of use of individual analgesics and sedatives in designated age categories.

|                                                                       |     | Age category |     |          |     |                        |     |                     |     |             |     | p-value* |
|-----------------------------------------------------------------------|-----|--------------|-----|----------|-----|------------------------|-----|---------------------|-----|-------------|-----|----------|
|                                                                       |     | Infants      |     | Toddlers |     | Preschool-age children |     | School-age children |     | Adolescents |     |          |
|                                                                       |     | n            | %   | n        | %   | n                      | %   | n                   | %   | n           | %   |          |
| Acetaminophen                                                         | No  | 90           | 98  | 249      | 91  | 267                    | 96  | 750                 | 95  | 989         | 97  | p=0.002  |
|                                                                       | Yes | 2            | 2   | 24       | 9   | 11                     | 4   | 37                  | 5   | 33          | 3   |          |
| Ibuprofen                                                             | No  | 92           | 100 | 270      | 99  | 277                    | 100 | 784                 | 100 | 1,017       | 100 | p=0.59   |
|                                                                       | Yes | -            | -   | 3        | 1   | 1                      | 0   | 3                   | 0   | 5           | 0   |          |
| Acetylsalicylic acid                                                  | No  | 92           | 100 | 273      | 100 | 278                    | 100 | 787                 | 100 | 1,022       | 100 | p=1.00   |
|                                                                       | Yes | -            | -   | -        | -   | -                      | -   | -                   | -   | -           | -   |          |
| Ketoprofen                                                            | No  | 92           | 100 | 273      | 100 | 278                    | 100 | 779                 | 99  | 962         | 94  | p<0.001  |
|                                                                       | Yes | -            | -   | -        | -   | -                      | -   | 8                   | 1   | 60          | 6   |          |
| Metamizole                                                            | No  | 92           | 100 | 273      | 100 | 278                    | 100 | 783                 | 99  | 1,001       | 98  | p=0.001  |
|                                                                       | Yes | -            | -   | -        | -   | -                      | -   | 4                   | 1   | 21          | 2   |          |
| Fentanyl                                                              | No  | 91           | 99  | 273      | 100 | 275                    | 99  | 779                 | 99  | 988         | 97  | p<0.001  |
|                                                                       | Yes | 1            | 1   | -        | -   | 3                      | 1   | 8                   | 1   | 34          | 3   |          |
| Morphine                                                              | No  | 88           | 96  | 246      | 90  | 260                    | 94  | 734                 | 93  | 963         | 94  | p=0.15   |
|                                                                       | Yes | 4            | 4   | 27       | 10  | 18                     | 6   | 53                  | 7   | 59          | 6   |          |
| Midanium                                                              | No  | 92           | 100 | 271      | 99  | 275                    | 99  | 787                 | 100 | 1,015       | 99  | p=0.11   |
|                                                                       | Yes | -            | -   | 2        | 1   | 3                      | 1   | -                   | -   | 7           | 1   |          |
| Diazepam                                                              | No  | 92           | 100 | 267      | 98  | 275                    | 99  | 786                 | 100 | 1,018       | 100 | p=0.001  |
|                                                                       | Yes | -            | -   | 6        | 2   | 3                      | 1   | 1                   | 0   | 4           | 0   |          |
| *χ <sup>2</sup> test; n—number of patients; %—percentage of patients; |     |              |     |          |     |                        |     |                     |     |             |     |          |
